# Supplementary material for: The Analytical Objective Hysteresis Model (AnOHM v1.0):Methodology to Determine Bulk Storage Heat Flux Coefficients
Source: Copernicus journal article supplement (doi:10.5194/gmd-2016-300), 2017-01-10
Supplement: Supplementary file [file gmd-2016-300-AC1-supplement.pdf]

## **Responses to Reviewer 1:**

1) *This paper is potential and well organized, but the language proficiency still needs to be polished by Professor Sue Grimmond who is the fourth author and a native English speaker.*

**Response:** we thank the reviewer for the positive comments on our work. The revised manuscript has been proof read by Prof. Grimmond and other colleagues who are native English speakers.

2) *It will be great if authors compare their own results with the previous work.*

**Response:** A full comparison in the simulated  $\Delta Q_s$  of AnOHM and OHM will be presented in an online study using the SUEWS framework. However, we added the initial comparison between AnOHM and OHM in Figure 6 and section 4.

3) *This paper is lacking a formal Discussion section. I suggest the authors develop this section.*

**Response:** The discussion part has been developed and formed in the new "Discussion and Conclusion" section.

4) *Line 14, suggest change "hampers application" to "hampers its application".*

**Response:** Changed as suggested.

5) *Line 15, change "1-dimensional" to "one-dimensional".*

**Response:** Changed as suggested.

6) *Lines 18-19, "From this albedo, Bowen ration and bulk transfer coefficient, solar radiation and wind speed are identified as being critical." I strongly recommend the authors revise this statement.*

**Response:** The statement has been rephrased as:

"The test suggests that albedo, Bowen ratio and bulk transfer coefficient, solar radiation and wind speed are identified as being critical."

7) *Line 21, change "OHM coefficients to" to "OHM coefficients".*

**Response:** Corrected as suggested.

8) *Page 2, Lines 9-10. "The volume of interest extends from the top of the roughness sub-layer to the depth in the ground where the vertical net heat conduction is zero on a daily basis (see Figure 2 in Masson et al., 2002)." The statement is contrary to its former statement.*

**Response:** We deem this statement is NOT contrary to the former statement: the former statement indicates the diurnal dynamics of heat storage in the canopy layer while the latter means the daily averaged heat storage is zero.

To better clarify our intent, this statement has been rephrased as follows:

"The volume of interest extends from the top of the roughness sub-layer to the depth in the ground where the daily average of vertical net heat conduction is zero."

9) *Page 2, Lines 11-16. It is recommended to add the references at where is appropriate, such as after "e.g. 5%", and after "the term becomes much more significant".*

**Response:** Added as suggested.

10) Page 2, Lines 19-33, Page 3, Lines 1-17. What are the disadvantages and advantages of OHM compared with the other techniques to determine the storage heat flux? The parts of listed different techniques are verbose (Page 2, Lines 22-33).

**Response:** Discussion on the advantages and disadvantages of OHM has been added: “OHM features the less demanding parameterisations and more direct understanding of control of  $\Delta Q_S$  by  $Q^*$  compared with other approaches. Despite the shortage of OHM coefficients for the wide range facet types, OHM captures the urban SEB processes (Grimmond and Oke, 1999; Järvi et al., 2011; 2014; Karsisto et al., 2015; Roth and Oke, 1995).

11) Page 3, Line 3. How to determine  $a_1$ ,  $a_2$  and  $a_3$  by observations?

**Response:** The three coefficients are determined by least square regression between  $\Delta Q_S$  and  $Q^*$  observations. This has been clarified in the revised manuscript.

12) Page 3, Lines 14-16. Suggest change the statement “Although, Gao et al. (2003; 2008) solved the 1-dimensional advection-diffusion equation of coupled heat and liquid water transport to explore the physical relation of OHM coefficients  $a_1$  and  $a_2$  to the phase lag between  $\Delta Q_S$  and  $Q^*$ ,” to “Although, the one-dimensional advection-diffusion equation of coupled heat and liquid water transport equation was solved by Gao et al. (2003, 2008), and the solution was used to explore the physical relation of OHM coefficients  $a_1$  and  $a_2$  to the phase lag between  $\Delta Q_S$  and  $Q^*$  (Gao et al., 2010), ”.

**Response:** Changed as suggested.

13) Page 3, Lines 19-26. What will be done and some results are mixed together. It is recommended that the authors revise those statements.

**Response:** This paragraph has been rephrased as follows:

“In this paper, the solutions of the one-dimensional advection-diffusion equation of coupled heat and liquid water transport (Gao et al., 2003; 2008) are employed with the SEB (eqn 1) to investigate more fully the three OHM coefficients, the outcomes of which lead to development of the Analytical Objective Hysteresis Model (AnOHM) (section 2). Then the Monte Carlo-based Subset Simulation (Au and Beck, 2001) approach is used to undertake the sensitivity analysis of AnOHM to surface properties and hydrometeorological conditions (section 3). An offline evaluation of AnOHM’s performance for five sites with different land covers (section 4) allows us to conclude that this is an alternative approach to obtain OHM coefficients. As this will allow application across a much wider range of environments and meteorological conditions, it has important implications for land surface modelling (urban and non-urban).”

14) Page 4.  $t$  should be defined below equation (3).

**Response:**  $t$  is time and has been defined in the revised manuscript.

15) Page 4. It is strongly recommended putting equation (7) before equation (4), as “The steady-periodic solution of equation (3) with boundary condition,  $T_s = A T_s \sin(\omega t - Y) + T_{s\_aver}$  (4)”.

**Response:** Changed as recommended.

16) Page 5. Albedo should be defined below equation (14).

**Response:** Defined below equation (14) as suggested.

17) Page 5, Line 9. It is recommended adding references or state the reason that it is reasonable to assume the incoming solar radiation and air temperature follow sinusoidal forms through a day as function of the mean value for the day.

**Response:** Reference (Sun et al., 2013) added as suggested.

18) Page 5, equation (8). Where is the term of longwave radiation from soil surface in the longwave radiation scale (equation (8))?

**Response:** We assume the reviewer referred to equation (10) for the outgoing longwave radiation. The longwave radiation from land surface is fully parameterised with surface temperature  $T_s$  according to the Stefan–Boltzmann law and thus no extra term is introduced.

19) Page 7, Section 2.4. I strongly recommend adding statements about the advance of the AnOHM coefficients compared with the previous OHM coefficients. Based on the abstract, to enhance physical interpretations of the OHM coefficients is one of the paper’s goals.

**Response:** Advances by AnOHM in the physical interpretation of OHM coefficients have been added in section 2.4 of the revised manuscript.

20) Page 8, Line 20. “Stull, 1998” should be placed at “(Table 1a, based on values reported in Stull (1982))”.

**Response:** Moved as suggested.

21) Page 9, Lines 15-17. Based on the statement “A positive (negative)  $S$  indicates an increase will lead to increase (decrease) in simulated value”, an increase in albedo will increase  $a_1$  and  $a_3$  while decrease  $a_2$ . Because Figure 2 shows that the  $S$  of  $a_1$  and  $a_3$  are positive and the  $S$  of  $a_2$  is negative. It is strongly recommended double-checking the other statements for surface properties and the statements for hydrometeorological forcing parameters.

**Response:** The original statement is correct after checking.

22) It may be interesting to compare the  $S$  of surface properties and hydrometeorological forcing parameters.

**Response:** We thank the reviewer for the suggestion. The discussion on the comparison in  $S$  between the surface properties and hydrometeorological forcing parameters has been added in section 5.

23) It is recommended comparing the results of sensitivity analysis to previous works.

**Response:** We thank the reviewer for the suggestion. The discussion on the comparison in  $S$  between the surface properties and hydrometeorological forcing parameters has been added in section 5.

24) What does the ability of AnOHM to capture intra-annual dynamics  $\Delta Q_s$  impact its simulation  $\Delta Q_s$ ?

**Response:** Such ability of AnOHM primarily improves the nocturnal magnitude of  $\Delta Q_s$  (represented by  $a_3$ ) as compared with OHM. The original  $a_3$  used in OHM approach usually adopts a single value (e.g., Järvi et al. (2014)) or two values for dry and wet seasons (e.g., Ward et al. (2016)) which constrains the dynamics of  $\Delta Q_s$  and in particular its nocturnal value. As the

seasonality can be well represented by solar radiation  $K_1$ , the inclusion of  $K_1$  in the parameterisation of  $a_3$  improves the nocturnal magnitude of  $\Delta Q_s$ .

25) *Authors should be sure to inform the reader of what may be lacking in the study as well as needs for future work.*

**Response:** The limitations of this work has been discussed in section 5 of the revised manuscript.

26) *It is recommended to add statement that how the current work actually advances science.*

**Response:** The perspectives of this work has been discussed in section 5 of the revised manuscript.

### References:

Au, S. K. and Beck, J. L.: Estimation of small failure probabilities in high dimensions by subset simulation, *Probabilistic Engineering Mechanics*, 16(4), 263–277, doi:10.1016/S0266-8920(01)00019-4, 2001.

Gao, Z., Fan, X. G. and Bian, L. G.: An analytical solution to one-dimensional thermal conduction-convection in soil, *Soil Science*, 168(2), 99–107, doi:10.1097/01.ss.0000055305.23789.be, 2003.

Gao, Z., Lenschow, D. H., Horton, R., Zhou, M., Wang, L. and Wen, J.: Comparison of two soil temperature algorithms for a bare ground site on the Loess Plateau in China, *J Geophys Res-Oc Atm*, 113(D18), D18105, 2008.

Grimmond, C. S. B. and Oke, T. R.: Heat storage in urban areas: local-scale observations and evaluation of a simple model, *J Appl Meteorol*, 38(7), 922–940, doi:10.1175/1520-0450(1999)038<0922:HSIUAL>2.0.CO;2, 1999.

Järvi, L., Grimmond, C. S. B. and Christen, A.: The Surface Urban Energy and Water Balance Scheme (SUEWS): Evaluation in Los Angeles and Vancouver, *J Hydrol*, 411(3-4), 219–237, doi:10.1016/j.jhydrol.2011.10.001, 2011.

Järvi, L., Grimmond, C. S. B., Taka, M., Nordbo, A., Setälä, H. and Strachan, I. B.: Development of the Surface Urban Energy and Water Balance Scheme (SUEWS) for cold climate cities, *Geoscientific Model Development*, 7(4), 1691–1711, doi:10.5194/gmd-7-1691-2014, 2014.

Karsisto, P., Fortelius, C., Demuzere, M., Grimmond, C. S. B., Oleson, K. W., Kouznetsov, R., Masson, V. and Järvi, L.: Seasonal surface urban energy balance and wintertime stability simulated using three land-surface models in the high-latitude city Helsinki, *Q.J.R. Meteorol. Soc.*, 142(694), 401–417, doi:10.1002/qj.2659, 2015.

Roth, M. and Oke, T. R.: Relative Efficiencies of Turbulent Transfer of Heat, Mass, and Momentum over a Patchy Urban Surface, *J. Atmos. Sci.*, 52(11), 1863–1874, doi:10.1175/1520-0469(1995)052<1863:reotto>2.0.co;2, 1995.

Sun, T., Wang, Z.-H. and Ni, G.-H.: Revisiting the hysteresis effect in surface energy budgets, *Geophys. Res. Lett.*, 40(9), 1741–1747, doi:10.1002/grl.50385, 2013.

Ward, H. C., Kotthaus, S., Järvi, L. and Grimmond, C. S. B.: Surface Urban Energy and Water Balance Scheme (SUEWS): Development and evaluation at two UK sites, *Urban Climate*, 18, 1–32, doi:10.1016/j.uclim.2016.05.001, 2016.
